# Supplementary material for: When and why? Timing of post-migration HIV acquisition among sub-Saharan migrants in France
Source: PubMed Central journal article supplement — Sex Transm Infect. 2019 Jul 26;96(3):227–31. doi: 10.1136/sextrans-2019-054080 (PMC7231462; doi:10.1136/sextrans-2019-054080), 2019-07-26
Supplement: sextrans-2019-054080supp001.pdf [file sextrans-2019-054080supp001.pdf]

**Supplementary Material 1. Comparison of demographic characteristics according to the group: reference group (not HIV infected), HIV acquisition pre settlement (0-6 years after migration), HIV acquisition post settlement (>6 years after migration).**

|                                                  | Men                                            |     |                                                                    |    |                |                                                                         |    |                | Women                       |     |                                      |    |                |                                       |    |                |
|--------------------------------------------------|------------------------------------------------|-----|--------------------------------------------------------------------|----|----------------|-------------------------------------------------------------------------|----|----------------|-----------------------------|-----|--------------------------------------|----|----------------|---------------------------------------|----|----------------|
|                                                  | Reference group<br>(not HIV infected)<br>N=194 |     | HIV Infection pre<br>settlement (0-6 y<br>after migration)<br>N=64 |    | p <sup>1</sup> | HIV Infection<br>post<br>settlement >6<br>y after<br>migration)<br>N=68 |    | p <sup>2</sup> | Reference<br>group<br>N=237 |     | Infections pre<br>settlement<br>N=97 |    | p <sup>1</sup> | Infections post<br>settlement<br>N=48 |    | p <sup>2</sup> |
|                                                  | %                                              | n   | %                                                                  | n  |                | %                                                                       | n  |                | %                           | n   | %                                    | n  |                | %                                     | n  |                |
| <b>Age</b>                                       |                                                |     |                                                                    |    |                |                                                                         |    |                |                             |     |                                      |    |                |                                       |    |                |
| 18-34                                            | 14.2                                           | 27  | 12.7                                                               | 8  | 0.719          | 1.0                                                                     | 2  | <0.05          | 19.2                        | 53  | 25.7                                 | 24 | <0.05          | 10.2                                  | 5  | 0.488          |
| 35-44                                            | 29.4                                           | 59  | 24.6                                                               | 17 |                | 16.0                                                                    | 9  |                | 28.0                        | 76  | 46.3                                 | 41 |                | 36.1                                  | 19 |                |
| 45-59                                            | 56.4                                           | 108 | 62.7                                                               | 39 |                | 83.0                                                                    | 57 |                | 52.9                        | 108 | 27.9                                 | 32 |                | 53.7                                  | 24 |                |
| <b>Recency of migration</b>                      |                                                |     |                                                                    |    |                |                                                                         |    |                |                             |     |                                      |    |                |                                       |    |                |
| Before 1996                                      | 55.2                                           | 96  | 53.3                                                               | 34 | 0.823          | 92.0                                                                    | 62 | <0.001         | 55.6                        | 121 | 40.4                                 | 46 | 0.063          | 87.8                                  | 44 | <0.05          |
| 1996-2004                                        | 44.8                                           | 98  | 46.7                                                               | 30 |                | 8.0                                                                     | 6  |                | 44.4                        | 116 | 59.6                                 | 51 |                | 12.2                                  | 4  |                |
| <b>Country of birth</b>                          |                                                |     |                                                                    |    |                |                                                                         |    |                |                             |     |                                      |    |                |                                       |    |                |
| West Africa                                      | 63.7                                           | 126 | 49.4                                                               | 32 | 0.090          | 62.9                                                                    | 46 | 0.655          | 53.7                        | 135 | 61.9                                 | 54 | 0.294          | 54.6                                  | 27 | 0.840          |
| Central Africa                                   | 34.2                                           | 64  | 49.7                                                               | 31 |                | 32.8                                                                    | 20 |                | 41.7                        | 92  | 38.1                                 | 43 |                | 38.0                                  | 19 |                |
| East/Southern Africa                             | 2.0                                            | 4   | 0.8                                                                | 1  |                | 4.3                                                                     | 2  |                | 4.6                         | 10  | 0.0                                  | 0  |                | 7.4                                   | 2  |                |
| <b>Age at arrival</b>                            |                                                |     |                                                                    |    |                |                                                                         |    |                |                             |     |                                      |    |                |                                       |    |                |
| 1-17                                             | 17.3                                           | 28  | 3.4                                                                | 2  | <0.05          | 12.7                                                                    | 11 | <0.05          | 22.0                        | 58  | 19.1                                 | 18 | ns             | 38.5                                  | 20 | ns             |
| 18-27                                            | 46.2                                           | 87  | 46.5                                                               | 32 |                | 69.8                                                                    | 42 |                | 44.3                        | 109 | 55.9                                 | 51 |                | 44.6                                  | 20 |                |
| 28 +                                             | 36.5                                           | 79  | 50.1                                                               | 30 |                | 17.6                                                                    | 15 |                | 33.8                        | 70  | 25.0                                 | 28 |                | 17.0                                  | 8  |                |
| <b>Education level at time of survey</b>         |                                                |     |                                                                    |    |                |                                                                         |    |                |                             |     |                                      |    |                |                                       |    |                |
| None/primary                                     | 27.6                                           | 56  | 16.8                                                               | 10 | ns             | 24.2                                                                    | 20 | ns             | 22.0                        | 52  | 24.1                                 | 24 | ns             | 12.5                                  | 7  | ns             |
| Secondary                                        | 41.1                                           | 79  | 47.4                                                               | 33 |                | 32.7                                                                    | 19 |                | 54.1                        | 126 | 55.8                                 | 57 |                | 71.4                                  | 31 |                |
| Superior                                         | 31.3                                           | 59  | 35.8                                                               | 21 |                | 43.2                                                                    | 29 |                | 24.0                        | 59  | 20.1                                 | 16 |                | 16.1                                  | 10 |                |
| <b>Reasons for coming to France</b>              |                                                |     |                                                                    |    |                |                                                                         |    |                |                             |     |                                      |    |                |                                       |    |                |
| Take a chance                                    | 39.4                                           | 88  | 45.5                                                               | 31 | ns             | 36.1                                                                    | 31 | ns             | 21.8                        | 60  | 30.2                                 | 31 | ns             | 15.7                                  | 6  | <0.05          |
| Family reasons                                   | 18.3                                           | 32  | 17.5                                                               | 8  |                | 11.7                                                                    | 10 |                | 52.5                        | 122 | 42.7                                 | 39 |                | 78.0                                  | 37 |                |
| Threatened in country of origin                  | 19.0                                           | 34  | 14.2                                                               | 10 |                | 12.5                                                                    | 4  |                | 11.1                        | 22  | 8.0                                  | 13 |                | 1.1                                   | 1  |                |
| Studies                                          | 23.4                                           | 40  | 22.7                                                               | 14 |                | 39.6                                                                    | 23 |                | 14.6                        | 32  | 19.0                                 | 14 |                | 5.3                                   | 4  |                |
| <b>Ever had one year with no resident permit</b> |                                                |     |                                                                    |    |                |                                                                         |    |                |                             |     |                                      |    |                |                                       |    |                |

|                                                                                                   |      |     |      |    |       |      |    |    |      |     |      |    |        |      |    |       |
|---------------------------------------------------------------------------------------------------|------|-----|------|----|-------|------|----|----|------|-----|------|----|--------|------|----|-------|
|                                                                                                   | 48.7 | 100 | 75.1 | 46 | <0.01 | 41.7 | 27 | ns | 40.5 | 96  | 57.2 | 54 | <0.10  | 27.8 | 17 | ns    |
| <b>Ever had one year with no stable housing</b>                                                   |      |     |      |    |       |      |    |    |      |     |      |    |        |      |    |       |
|                                                                                                   | 26.0 | 52  | 30.6 | 23 | ns    | 31.8 | 18 | ns | 15.2 | 43  | 28.5 | 34 | <0.05  | 18.9 | 8  | ns    |
| <b>Had at least one stable partnership during the first six years in France</b>                   |      |     |      |    |       |      |    |    |      |     |      |    |        |      |    |       |
|                                                                                                   | 30.8 | 59  | 30.4 | 19 | ns    |      |    |    | 70.4 | 165 | 54.5 | 54 | <0.01  |      |    |       |
| <b>Had at least one stable partnership after six years in France</b>                              |      |     |      |    |       |      |    |    |      |     |      |    |        |      |    |       |
|                                                                                                   | 26.2 | 58  |      |    |       | 23.8 | 12 | ns | 69.2 | 166 |      |    |        | 51.6 | 23 | ns    |
| <b>Had at least one casual or transactional partnerships during the first six years in France</b> |      |     |      |    |       |      |    |    |      |     |      |    |        |      |    |       |
|                                                                                                   | 51.4 | 99  | 62.3 | 40 | ns    |      |    |    | 14.1 | 35  | 41.3 | 37 | <0.001 |      |    |       |
| <b>Had at least one casual or transactional partnerships after six years in France</b>            |      |     |      |    |       |      |    |    |      |     |      |    |        |      |    |       |
|                                                                                                   | 59.8 | 111 |      |    |       | 68.6 | 50 | ns | 25.3 | 57  |      |    |        | 43.6 | 22 | <0.10 |
| <b>Had at least one concurrent partnership during the first six years in France</b>               |      |     |      |    |       |      |    |    |      |     |      |    |        |      |    |       |
|                                                                                                   | 37.4 | 73  | 38.2 | 23 | ns    |      |    |    | 9.4  | 20  | 18.5 | 18 | <0.05  |      |    |       |
| <b>Had at least one concurrent partnership after six years in France</b>                          |      |     |      |    |       |      |    |    |      |     |      |    |        |      |    |       |
|                                                                                                   | 50.2 | 88  |      |    |       | 59.5 | 48 | ns | 16.7 | 33  |      |    |        | 30.8 | 14 | ns    |

p1: Infection during settlement *versus* reference group | p2 Infection post settlement *versus* Reference group
